# Supplementary material for: A GLP1 receptor agonist diabetes drug ameliorates neurodegeneration in a mouse model of infantile neurometabolic disease
Source: PubMed Central journal article supplement (PMC9378686; doi:10.1038/s41598-022-17338-1), 2022-08-15
Supplement: 41598_2022_17338_MOESM1_ESM.pdf [file 41598_2022_17338_MOESM1_ESM.pdf]

## Supplementary Materials

Fig. S1. Improvement of locomotor symptoms in *Pla2g6*<sup>-/-</sup> mice with weekly Semaglutide treatment.

Fig. S2. H&E staining of brain (A) and visceral organs (B) sections.

Fig. S3. Ct Gapdh Values for qPCR.

Fig. S4. P-GSK3 $\beta$  Y216 Western blot and quantification.

Fig. S5. Full length Western blots of RIP, RIP3 and  $\beta$ -actin.

Table S1. Primers sequence table for qPCR.

Table S2. Summary table of antibodies used for the ICH and western blot.

Table S3. Forward and Reverse Primers sequences table for genotyping.

Table S4. *P* values for Fig 1.

Table S5. *P* values for Fig 2.

Table S6. *P* values for Fig 3.

Table S7. *P* values for Fig 4.

Table S8. *P* values for Fig 5.

Table S9. *P* values for Fig 6.

Table S10. *P* values for Fig S1.

Table S11. *P* values for Fig S3.

Fig. S1. Improvement of locomotor symptoms in Pla2g6<sup>-/-</sup> mice with weekly Semaglutide treatment.

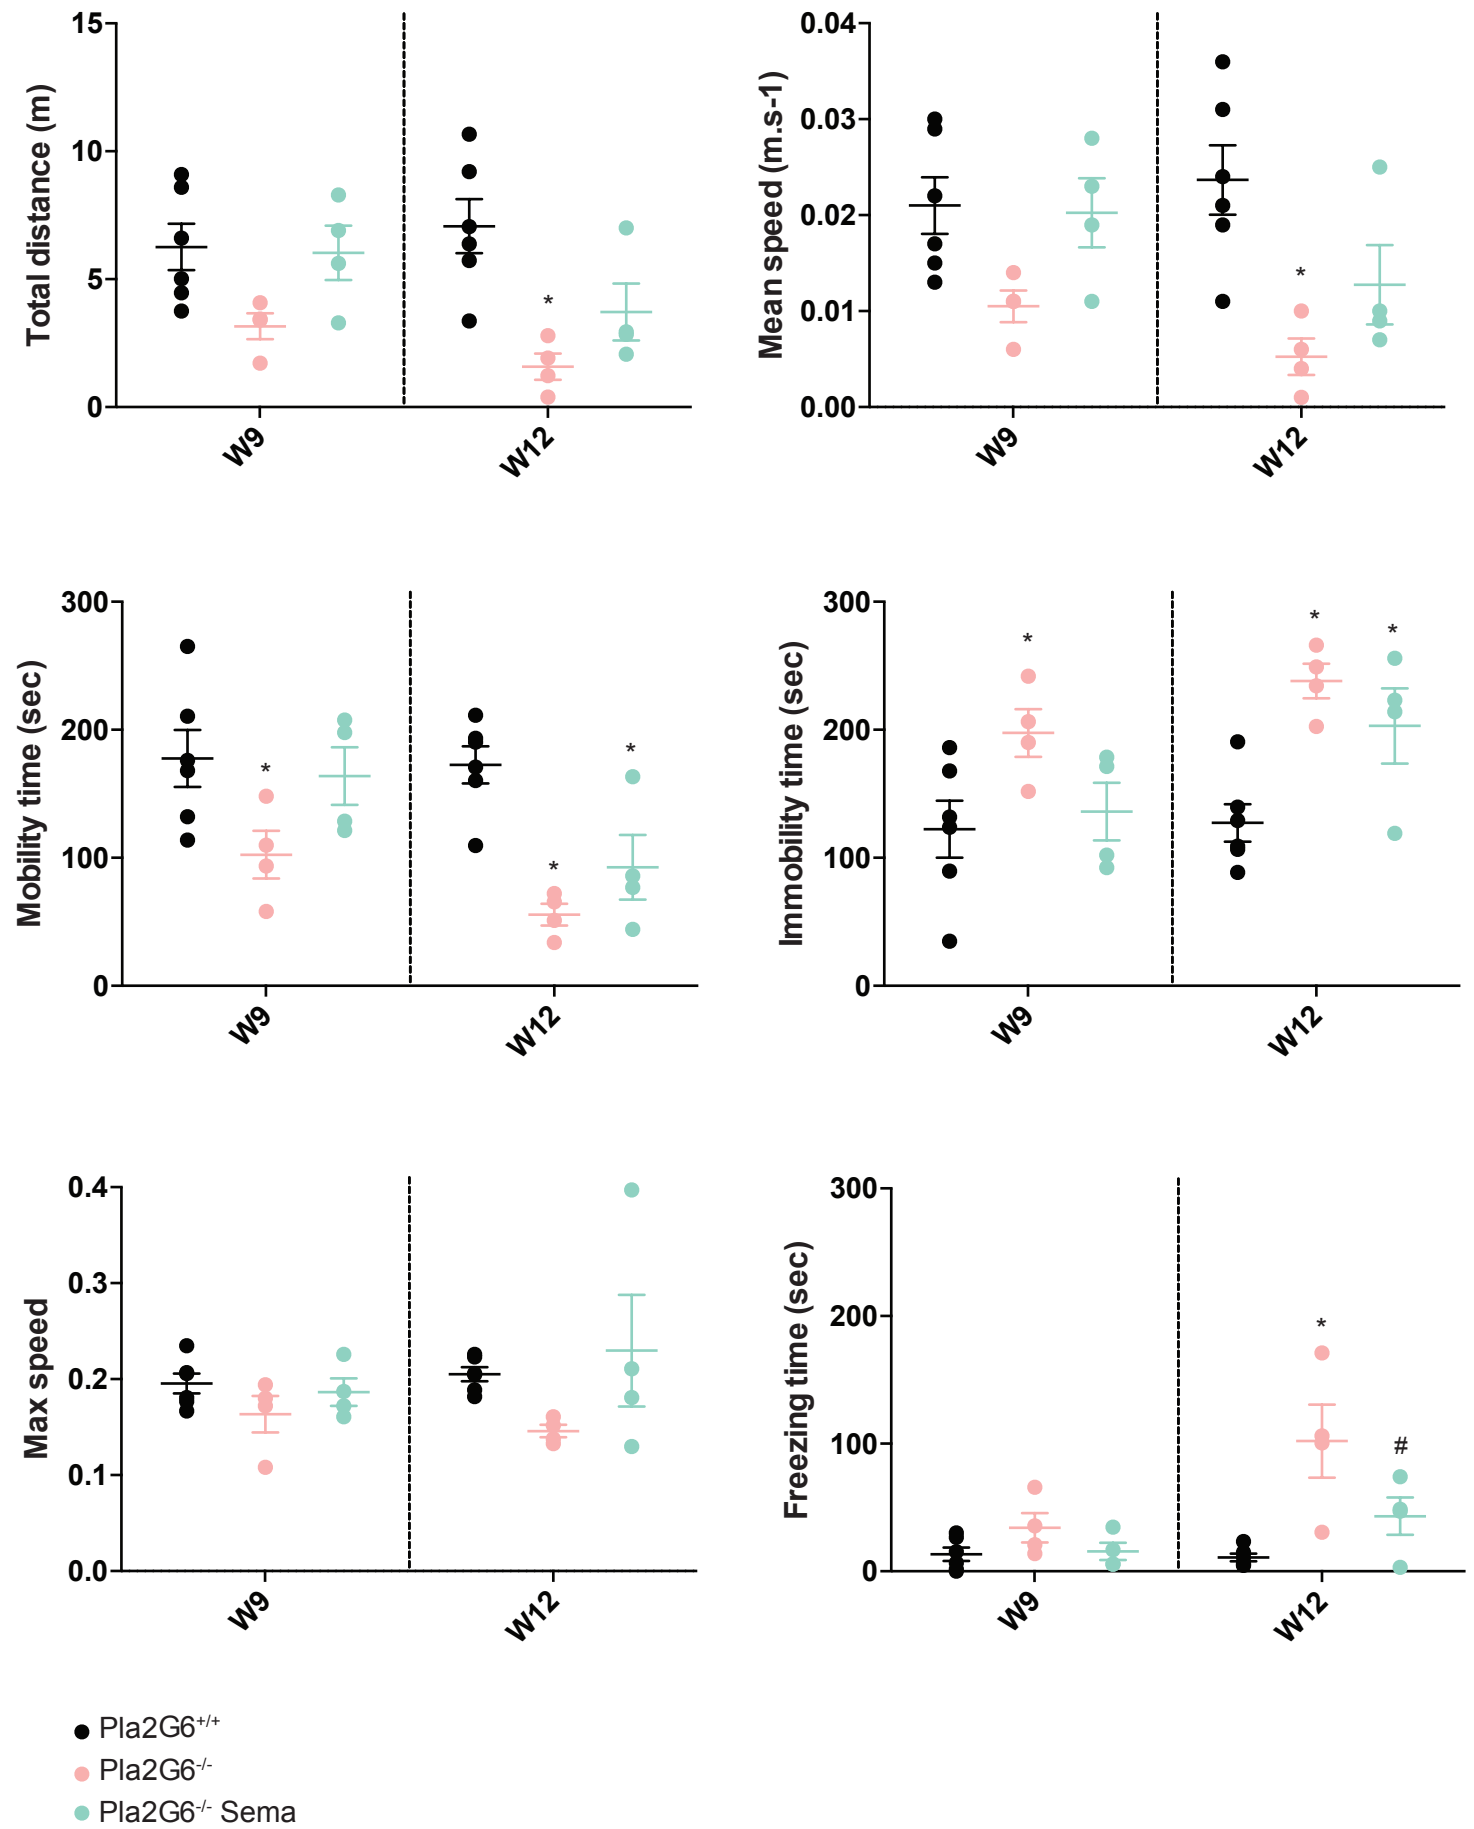

Fig. S2. H&E staining of brain (A) and visceral organs (B) sections.

A

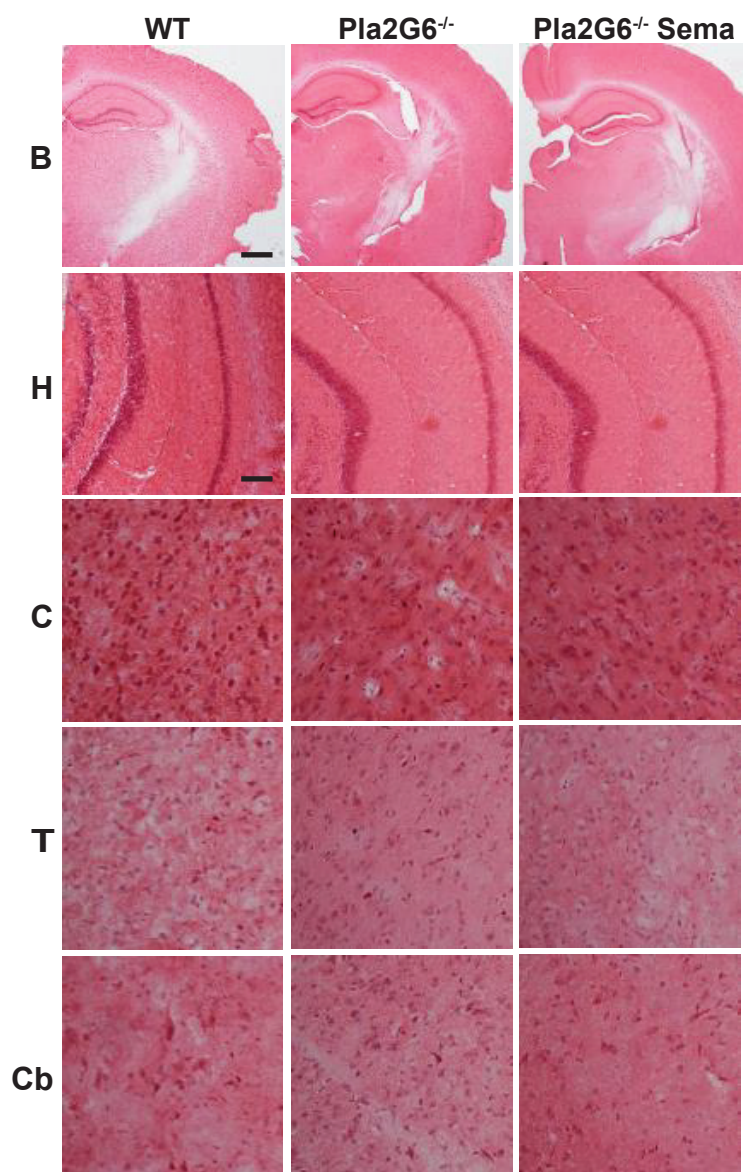

B

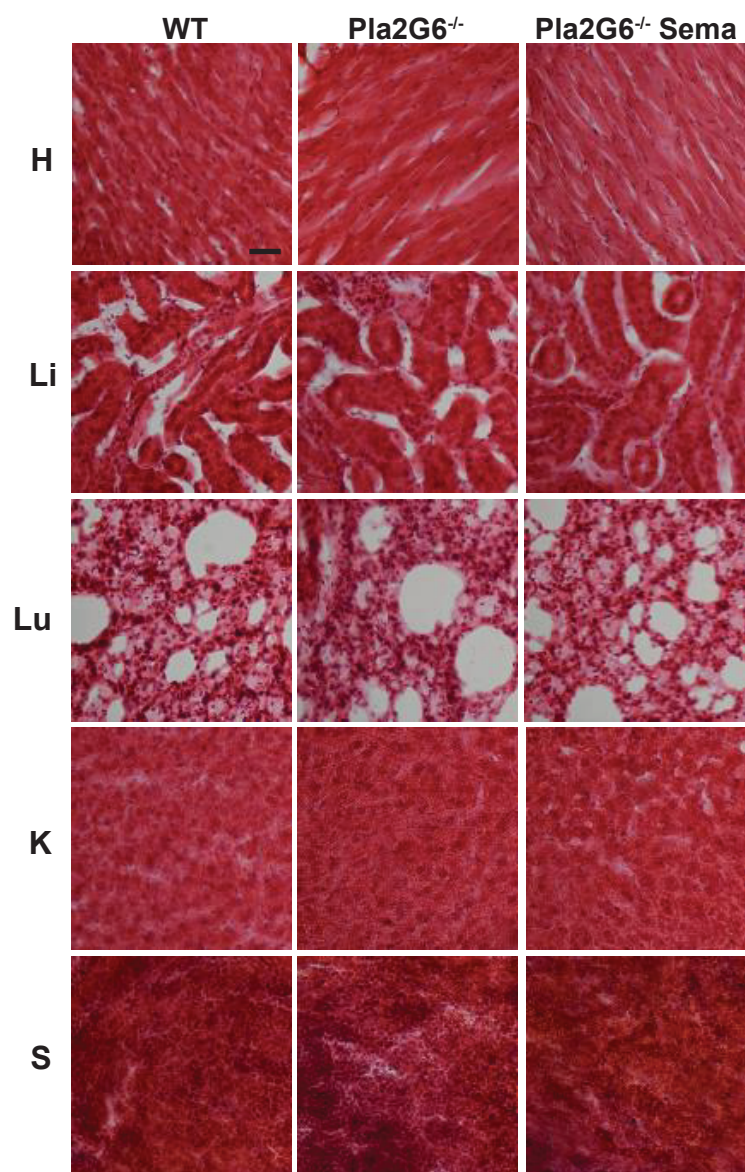

Fig. S3. Ct Gapdh Values for qPCR.

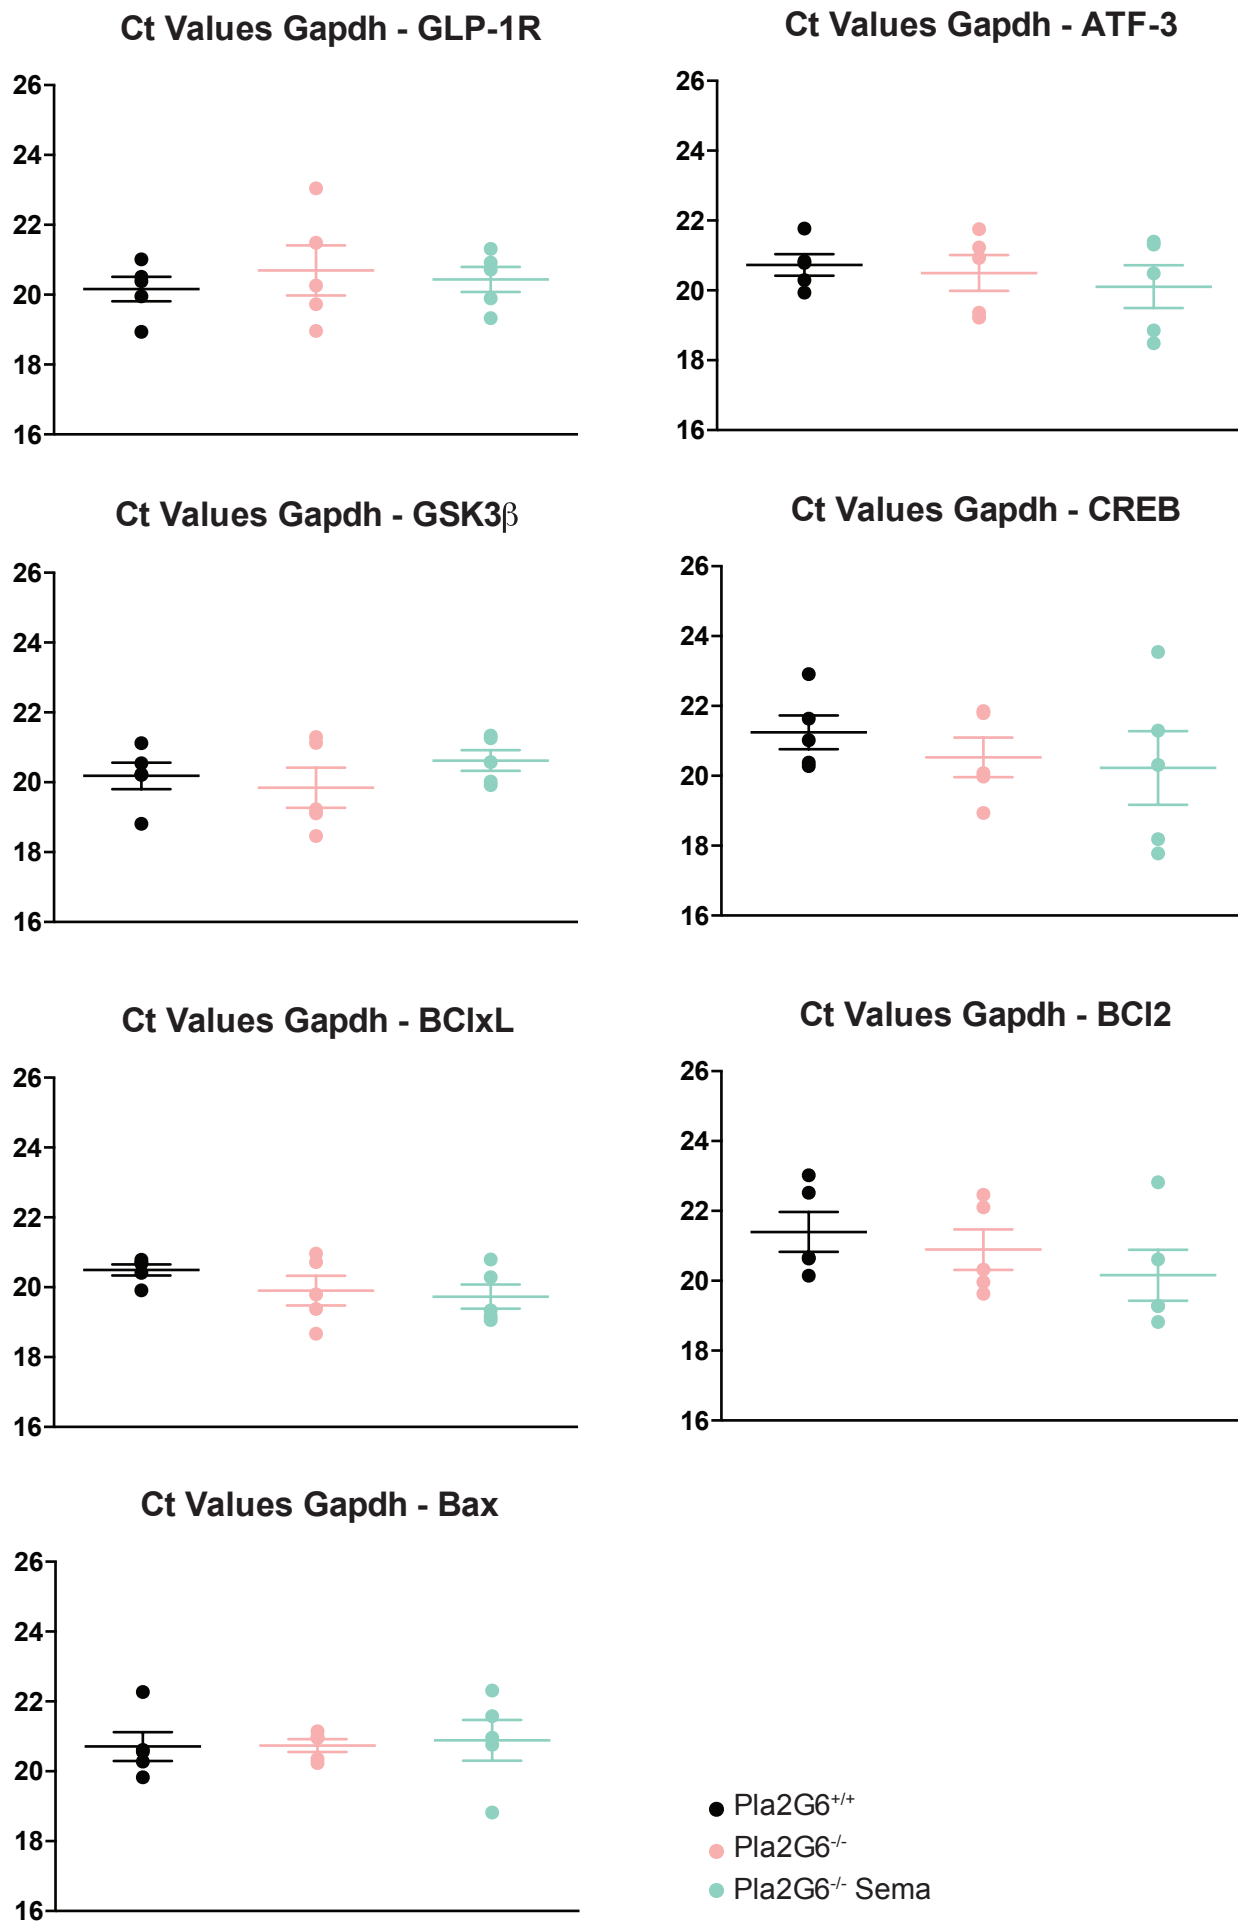

Fig. S4. P-GSK3 $\beta$  Y216 full-length blot.

P-GSK3 $\beta$  Y216 blot

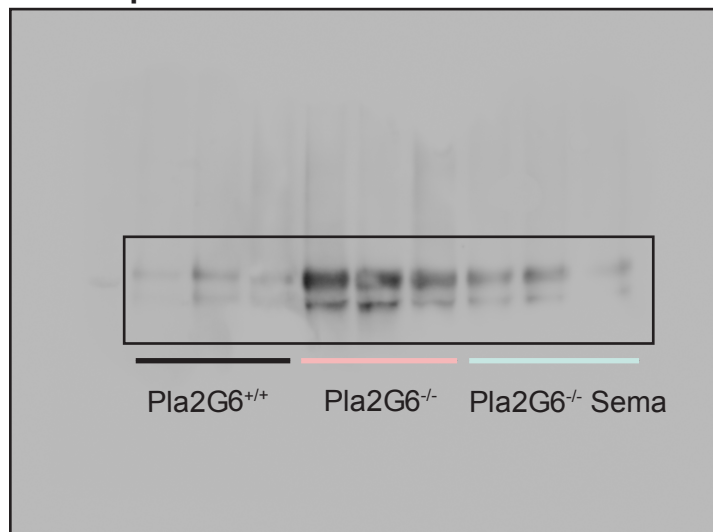

Actin blot

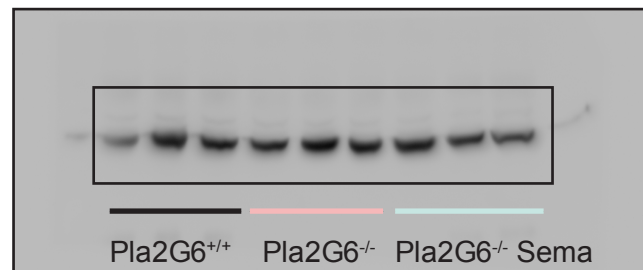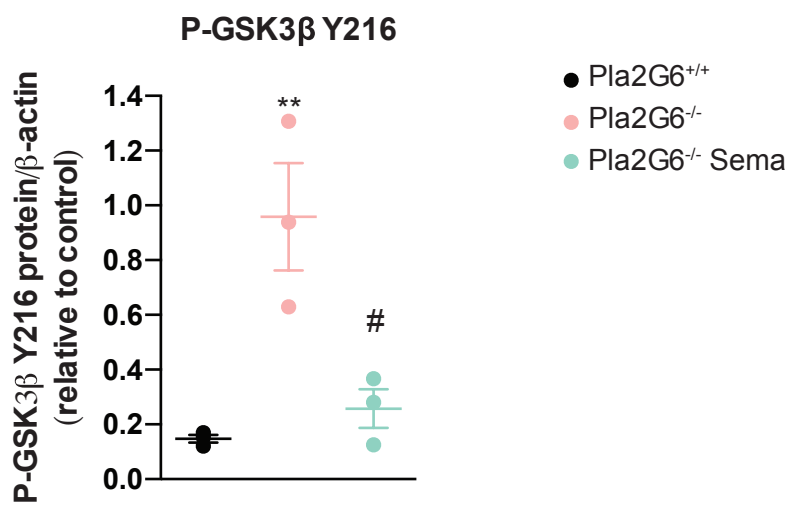

Table S12

|                                                      | <i>P</i> value |
|------------------------------------------------------|----------------|
| Pla2G6 <sup>+/+</sup> vs. Pla2G6 <sup>-/-</sup>      | 0.0075         |
| Pla2G6 <sup>+/+</sup> vs. Pla2G6 <sup>-/-</sup> Sema | 0.8011         |
| Pla2G6 <sup>-/-</sup> vs. Pla2G6 <sup>-/-</sup> Sema | 0.0148         |

**Fig. S5. Full-length blots.**

**RIP1 blot**

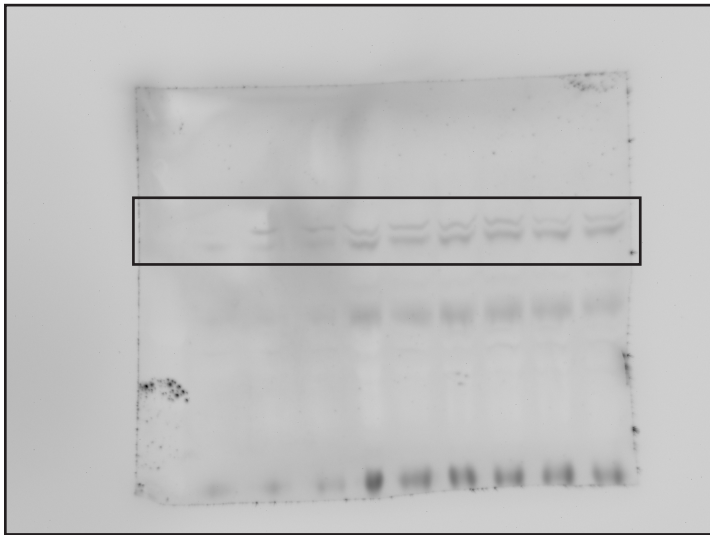

**RIP3 blot**

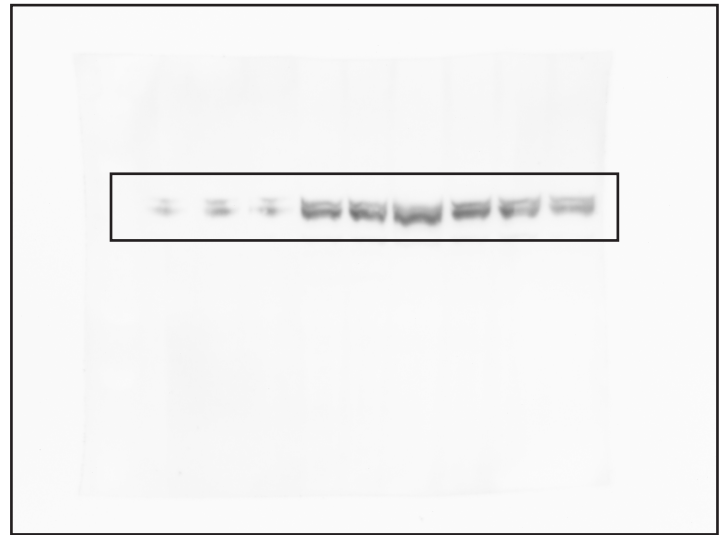

**Actin blot**

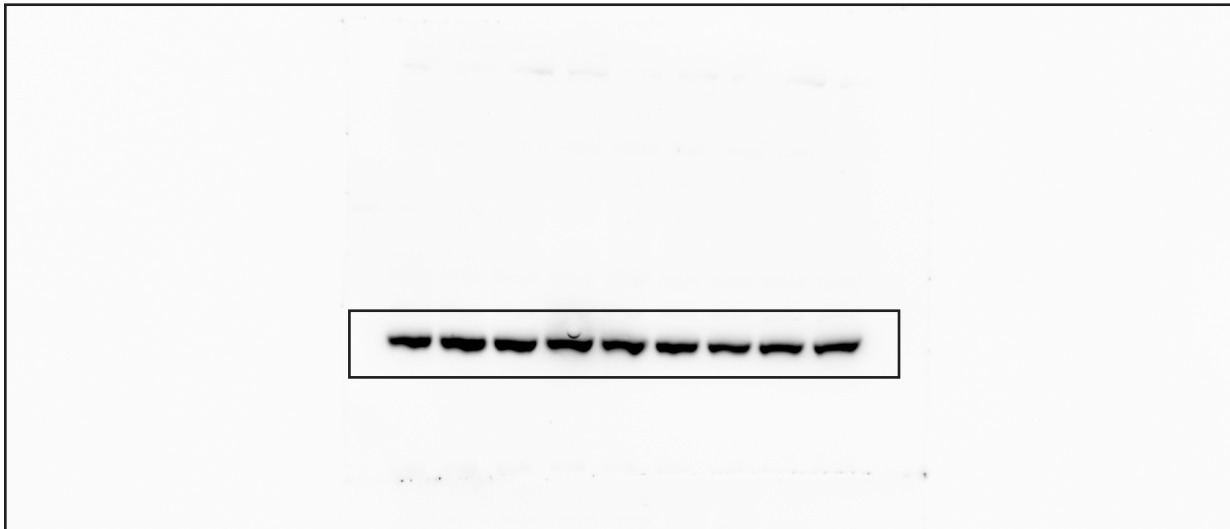

# Supplementary Data Tables

| Target Gene        | Sequence                                                                   | Reference     |
|--------------------|----------------------------------------------------------------------------|---------------|
| Gapdh              | <u>F</u> GTTGCTCCTGCGACTTCA<br><u>R</u> GGTGGTCCAGGGTTTCTTA                | Pick primers  |
| CREB               | <u>F</u> CACAGAACCAGTTTCCATCATCCAGT<br><u>R</u> CATGTTCCAGAGGGTTAGGGAGAGCA | Miller, 2012  |
| GSK3 $\beta$       | <u>F</u> TTGACAAAGGTCTTCCGGC<br><u>R</u> AAGAGTGCAGGTGTGTCTCG              | Li, 2015      |
| GLP1-R             | <u>F</u> AGACGGTGCAGAAATGGAGA<br><u>R</u> TGCGCTTCCGTGAGG                  | During, 2003  |
| ATF-3              | <u>F</u> TTACCGTCAACAACAGACCC<br><u>R</u> TCAGCTCAGCATTCACTC               | Edagawa, 2014 |
| BCI2               | <u>F</u> GTGGTGGAGGAACCTTTCAG<br><u>R</u> GTTCCACAAAGGCATCCAG              | Wenyuan, 2016 |
| BCI <sub>x</sub> L | <u>F</u> CGGAGAGCGTTCAGTGATCTA<br><u>R</u> TTGTCTACGCTTTCACGCA             | Pick primers  |
| Bax                | <u>F</u> AGCAAAGTGGTGTCAAGGC<br><u>R</u> CCACAAAGATGGTCACTGTC              | Wenyuan, 2016 |

| Antibody            | Reference | Dilution | Protocol |
|---------------------|-----------|----------|----------|
| CD68                | MCA1957   | 1:2000   | ICH      |
| NeuN                | MAB377    | 1:500    | ICH      |
| Iba-1               | ab5076    | 1:500    | ICH      |
| GFAP                | MAB3402   | 1:2000   | ICH      |
| RIP1                | ab72139   | 1:1000   | WB       |
| Actin               | ab8226    | 1:5000   | WB       |
| P-GSK3 $\beta$ Y216 | ab75745   | 1:1000   | WB       |

| Gene             | Sequence                                              | Size   |
|------------------|-------------------------------------------------------|--------|
| Pla2G6<br>WT     | R: CTCTGCTTGTCTGCTGCTG<br>F: GTCAAAGCCCTCATTGTATTCGG  | 346 bp |
| Pla2G6<br>Mutant | R: GGAGGGTCGGGTCCTATTTA<br>F: GTCAAAGCCCTCATTGTATTCAG | 617 bp |

|                                                                                        | % Survival |
|----------------------------------------------------------------------------------------|------------|
| <b>Pla2G6<sup>-/-</sup> vs. Pla2G6<sup>-/-</sup> Sema 0.5ug/week</b>                   | <0.001     |
| <b>Pla2G6<sup>-/-</sup> vs. Pla2G6<sup>-/-</sup> Sema 0.25ug/week</b>                  | 0.0505     |
| <b>Pla2G6<sup>-/-</sup> vs. Pla2G6<sup>-/-</sup> Sema 0.15ug/week</b>                  | 0.5107     |
| <b>Pla2G6<sup>-/-</sup> Sema 0.25ug/week vs. Pla2G6<sup>-/-</sup> Sema 0.15ug/week</b> | >0.9999    |
| <b>Pla2G6<sup>-/-</sup> Sema 0.25ug/week vs. Pla2G6<sup>-/-</sup> Sema 0.5ug/week</b>  | 0.7429     |
| <b>Pla2G6<sup>-/-</sup> Sema 0.15ug/week vs. Pla2G6<sup>-/-</sup> Sema 0.5ug/week</b>  | 0.0457     |

|                                                           | Age (weeks) |        |        |        |        |        |        |        |        |        |
|-----------------------------------------------------------|-------------|--------|--------|--------|--------|--------|--------|--------|--------|--------|
|                                                           | W5          | W6     | W7     | W8     | W9     | W10    | W11    | W12    | W13    | W14    |
| <b>Pla2G6<sup>+/+</sup> vs. Pla2G6<sup>-/-</sup></b>      | 0.7601      | 0.5981 | 0.5507 | 0.448  | 0.3947 | 0.0163 | 0.0003 | 0.0161 | 0.0087 | 0.0058 |
| <b>Pla2G6<sup>+/+</sup> vs. Pla2G6<sup>-/-</sup> Sema</b> | 0.9996      | 0.9989 | 0.9972 | 0.8484 | 0.9616 | 0.9139 | 0.1149 | 0.4664 | 0.3332 | 0.3469 |
| <b>Pla2G6<sup>-/-</sup> vs. Pla2G6<sup>-/-</sup> Sema</b> | 0.7818      | 0.6258 | 0.6488 | 0.2473 | 0.6104 | 0.0773 | 0.1475 | 0.3022 | 0.314  | 0.2473 |

|                                                           | Age (weeks) |          |        |        |        |          |          |          |          |          |
|-----------------------------------------------------------|-------------|----------|--------|--------|--------|----------|----------|----------|----------|----------|
|                                                           | W5          | W6       | W7     | W8     | W9     | W10      | W11      | W12      | W13      | W14      |
| <b>Pla2G6<sup>+/+</sup> vs. Pla2G6<sup>-/-</sup></b>      | 0.4734      | > 0.9999 | 0.9974 | 0.2104 | 0.0002 | < 0.0001 | < 0.0001 | < 0.0001 | < 0.0001 | < 0.0001 |
| <b>Pla2G6<sup>+/+</sup> vs. Pla2G6<sup>-/-</sup> Sema</b> | 0.944       | 0.9965   | 0.9275 | 0.9495 | 0.9976 | 0.3005   | 0.0998   | 0.0006   | 0.0001   | < 0.0001 |
| <b>Pla2G6<sup>-/-</sup> vs. Pla2G6<sup>-/-</sup> Sema</b> | 0.7204      | 0.9964   | 0.9154 | 0.4152 | 0.0008 | < 0.0001 | < 0.0001 | 0.0016   | 0.0033   | 0.3467   |

**Table S5. P values for Fig. 2.**

|                                                      | GLP1-R mRNA<br><i>P</i> value | ATF-3 mRNA<br><i>P</i> value | GSK3 $\beta$ mRNA<br><i>P</i> value | CREB mRNA<br><i>P</i> value | S1BF NeuN<br><i>P</i> value | VPM/VPL NeuN<br><i>P</i> value |
|------------------------------------------------------|-------------------------------|------------------------------|-------------------------------------|-----------------------------|-----------------------------|--------------------------------|
| Pla2G6 <sup>+/+</sup> vs. Pla2G6 <sup>-/-</sup>      | 0.6872                        | < 0,0001                     | 0.0001                              | 0.0003                      | < 0,0001                    | < 0,0001                       |
| Pla2G6 <sup>+/+</sup> vs. Pla2G6 <sup>-/-</sup> Sema | 0.0003                        | 0.1873                       | 0.9506                              | 0.9617                      | < 0,0001                    | < 0,0001                       |
| Pla2G6 <sup>-/-</sup> vs. Pla2G6 <sup>-/-</sup> Sema | < 0,0001                      | 0.0005                       | < 0,0001                            | 0.0002                      | 0.0006                      | 0.0012                         |

**Table S6. P values for Fig. 3.**

|                                                      | BClxl mRNA<br><i>P</i> value | Bcl2 mRNA<br><i>P</i> value | Bax mRNA<br><i>P</i> value | RIP1 protein<br><i>P</i> value | RIP3 protein<br><i>P</i> value |
|------------------------------------------------------|------------------------------|-----------------------------|----------------------------|--------------------------------|--------------------------------|
| Pla2G6 <sup>+/+</sup> vs. Pla2G6 <sup>-/-</sup>      | < 0,0001                     | 0.0001                      | < 0,0001                   | 0.0329                         | < 0,0001                       |
| Pla2G6 <sup>+/+</sup> vs. Pla2G6 <sup>-/-</sup> Sema | 0.3552                       | 0.1814                      | 0.0115                     | 0.2692                         | 0.0003                         |
| Pla2G6 <sup>-/-</sup> vs. Pla2G6 <sup>-/-</sup> Sema | 0.0002                       | 0.0028                      | 0.015                      | 0.2867                         | 0.0009                         |

**Table S7. P values for Fig. 4.**

|                                                      | Iba-1                    |                               |                            |                              |
|------------------------------------------------------|--------------------------|-------------------------------|----------------------------|------------------------------|
|                                                      | Cortex<br><i>P</i> value | Hippocampus<br><i>P</i> value | Thalamus<br><i>P</i> value | Cerebellum<br><i>P</i> value |
| Pla2G6 <sup>+/+</sup> vs. Pla2G6 <sup>-/-</sup>      | 0.0002                   | 0.0072                        | 0.0002                     | 0.0122                       |
| Pla2G6 <sup>+/+</sup> vs. Pla2G6 <sup>-/-</sup> Sema | 0.2666                   | 0.7235                        | 0.2666                     | 0.3026                       |
| Pla2G6 <sup>-/-</sup> vs. Pla2G6 <sup>-/-</sup> Sema | 0.0057                   | 0.043                         | 0.0057                     | 0.2176                       |

|                                                      | CD68                     |                               |                            |                              |
|------------------------------------------------------|--------------------------|-------------------------------|----------------------------|------------------------------|
|                                                      | Cortex<br><i>P</i> value | Hippocampus<br><i>P</i> value | Thalamus<br><i>P</i> value | Cerebellum<br><i>P</i> value |
| Pla2G6 <sup>+/+</sup> vs. Pla2G6 <sup>-/-</sup>      | 0.0059                   | > 0,9999                      | < 0,0001                   | < 0,0001                     |
| Pla2G6 <sup>+/+</sup> vs. Pla2G6 <sup>-/-</sup> Sema | 0.832                    | 0.0648                        | 0.982                      | 0.9761                       |
| Pla2G6 <sup>-/-</sup> vs. Pla2G6 <sup>-/-</sup> Sema | 0.0043                   | 0.0641                        | < 0,0001                   | < 0,0001                     |

|                                                      | GFAP                     |                               |                            |                              |
|------------------------------------------------------|--------------------------|-------------------------------|----------------------------|------------------------------|
|                                                      | Cortex<br><i>P</i> value | Hippocampus<br><i>P</i> value | Thalamus<br><i>P</i> value | Cerebellum<br><i>P</i> value |
| Pla2G6 <sup>+/+</sup> vs. Pla2G6 <sup>-/-</sup>      | 0.8969                   | < 0,0001                      | 0.0028                     | 0.0015                       |
| Pla2G6 <sup>+/+</sup> vs. Pla2G6 <sup>-/-</sup> Sema | 0.3454                   | 0.9847                        | 0.3357                     | 0.006                        |
| Pla2G6 <sup>-/-</sup> vs. Pla2G6 <sup>-/-</sup> Sema | 0.6355                   | 0.0001                        | 0.0539                     | 0.6126                       |

**Table S8. P values for Fig 5.**

|                                                      | Vacuoles<br><i>P</i> value |
|------------------------------------------------------|----------------------------|
| Pla2G6 <sup>+/+</sup> vs. Pla2G6 <sup>-/-</sup>      | 0.0001                     |
| Pla2G6 <sup>+/+</sup> vs. Pla2G6 <sup>-/-</sup> Sema | 0.0375                     |
| Pla2G6 <sup>-/-</sup> vs. Pla2G6 <sup>-/-</sup> Sema | 0.0047                     |

|                                                      | Spheroids                |                               |                            |                              |
|------------------------------------------------------|--------------------------|-------------------------------|----------------------------|------------------------------|
|                                                      | Cortex<br><i>P</i> value | Hippocampus<br><i>P</i> value | Thalamus<br><i>P</i> value | Cerebellum<br><i>P</i> value |
| Pla2G6 <sup>+/+</sup> vs. Pla2G6 <sup>-/-</sup>      | < 0,0001                 | < 0,0001                      | 0.014                      | 0.0003                       |
| Pla2G6 <sup>+/+</sup> vs. Pla2G6 <sup>-/-</sup> Sema | 0.0001                   | 0.0001                        | 0.0025                     | 0.0008                       |
| Pla2G6 <sup>-/-</sup> vs. Pla2G6 <sup>-/-</sup> Sema | 0.2637                   | 0.2068                        | 0.4889                     | 0.7448                       |



**Table S9. P values for Fig. 6.**

|                                                           | CD68             |                  |                   |                 |                  |                   |
|-----------------------------------------------------------|------------------|------------------|-------------------|-----------------|------------------|-------------------|
|                                                           | Brain<br>P value | Heart<br>P value | Kidney<br>P value | Lung<br>P value | Liver<br>P value | Spleen<br>P value |
| Pla2G6 <sup>+/+</sup> vs. Pla2G6 <sup>+/+</sup> 1/10 dose | > 0,9999         | > 0,9999         | > 0,9999          | > 0,9999        | > 0,9999         | > 0,9999          |
| Pla2G6 <sup>+/+</sup> vs. Pla2G6 <sup>+/+</sup> 1/2 dose  | 0.339            | > 0,9999         | > 0,9999          | 0.2685          | 0.639            | > 0,9999          |
| Pla2G6 <sup>+/+</sup> vs. Pla2G6 <sup>+/+</sup> Full-dose | > 0,9999         | > 0,9999         | > 0,9999          | > 0,9999        | 0.9247           | 0.339             |

  

|                                                      | Total WBC<br>P value | Neutrophils<br>P value | Lymphocytes<br>P value | Monocytes<br>P value | Eosinophils<br>P value |
|------------------------------------------------------|----------------------|------------------------|------------------------|----------------------|------------------------|
| Pla2G6 <sup>+/+</sup> vs. Pla2G6 <sup>-/-</sup> Sema | 0.1143               | 0.4857                 | 0.6571                 | 0.0286               | 0.3429                 |

  

|                                                      | Basophils<br>P value | Haematocrit<br>P value | Platelets<br>P value | Red blood cells<br>P value | Haemoglobin<br>P value |
|------------------------------------------------------|----------------------|------------------------|----------------------|----------------------------|------------------------|
| Pla2G6 <sup>+/+</sup> vs. Pla2G6 <sup>-/-</sup> Sema | 0.3429               | 0.0286                 | 0.6571               | 0.0286                     | 0.0286                 |

**Table S10. P values for Fig. S1.**

|                                                      | Total distance (m) |                | Immobility time (s) |                |
|------------------------------------------------------|--------------------|----------------|---------------------|----------------|
|                                                      | W9<br>P value      | W12<br>P value | W9<br>P value       | W12<br>P value |
| Pla2G6 <sup>+/+</sup> vs. Pla2G6 <sup>-/-</sup>      | 0.0843             | 0.0013         | 0.0485              | 0.0027         |
| Pla2G6 <sup>+/+</sup> vs. Pla2G6 <sup>-/-</sup> Sema | 0.9975             | 0.0563         | 0.9529              | 0.0463         |
| Pla2G6 <sup>-/-</sup> vs. Pla2G6 <sup>-/-</sup> Sema | 0.1721             | 0.3991         | 0.1845              | 0.6291         |

  

|                                                      | Mean speed (m.s-1) |                | Max speed     |                |
|------------------------------------------------------|--------------------|----------------|---------------|----------------|
|                                                      | W9<br>P value      | W12<br>P value | W9<br>P value | W12<br>P value |
| Pla2G6 <sup>+/+</sup> vs. Pla2G6 <sup>-/-</sup>      | 0.0895             | 0.0016         | 0.6881        | 0.2067         |
| Pla2G6 <sup>+/+</sup> vs. Pla2G6 <sup>-/-</sup> Sema | 0.9978             | 0.074          | 0.9891        | 0.8286         |
| Pla2G6 <sup>-/-</sup> vs. Pla2G6 <sup>-/-</sup> Sema | 0.1779             | 0.3783         | 0.8845        | 0.0707         |

  

|                                                      | Mobility time (s) |                | W14           |                |
|------------------------------------------------------|-------------------|----------------|---------------|----------------|
|                                                      | W9<br>P value     | W12<br>P value | W9<br>P value | W14<br>P value |
| Pla2G6 <sup>+/+</sup> vs. Pla2G6 <sup>-/-</sup>      | 0.0366            | 0.001          | 0.5659        | < 0,0001       |
| Pla2G6 <sup>+/+</sup> vs. Pla2G6 <sup>-/-</sup> Sema | 0.9462            | 0.0245         | 0.9988        | 0.2048         |
| Pla2G6 <sup>-/-</sup> vs. Pla2G6 <sup>-/-</sup> Sema | 0.1544            | 0.5521         | 0.7142        | 0.0151         |

**Table S11. P values for Fig. S3.**

|                                                      | Ct Values GAPDH   |                  |                  |                 |                  |                 |                |
|------------------------------------------------------|-------------------|------------------|------------------|-----------------|------------------|-----------------|----------------|
|                                                      | GLP1-R<br>P value | ATF-3<br>P value | GSK3β<br>P value | CREB<br>P value | BC1xL<br>P value | Bcl2<br>P value | Bax<br>P value |
| Pla2G6 <sup>+/+</sup> vs. Pla2G6 <sup>-/-</sup>      | 0.7375            | 0.9426           | 0.7581           | 0.78            | 0.264            | 0.841           | 0.999          |
| Pla2G6 <sup>+/+</sup> vs. Pla2G6 <sup>-/-</sup> Sema | 0.9221            | 0.658            | 0.8479           | 0.6105          | 0.4353           | 0.3789          | 0.9543         |
| Pla2G6 <sup>-/-</sup> vs. Pla2G6 <sup>-/-</sup> Sema | 0.9284            | 0.8438           | 0.4383           | 0.9554          | 0.9261           | 0.6981          | 0.9665         |
